# Supplementary material for: Comparing Factors Related to Any Conventional Cigarette Smokers, Exclusive New Alternative Product Users, and Non-Users among Japanese Youth: A Nationwide Survey
Source: MDPI journal article supplement (doi:10.3390/ijerph17093128), 2020-04-30
Supplement: s1 [file s1]

**Supplementary file 1.****Student Survey of Tobacco, e-Cigarette, and Heated Tobacco Product Use**

Please circle one answer for each question:

**1. Demographic data**

(1) Are you male or female?

Male          Female

(2) What is your school grade?

Grade 1      Grade 2      Grade 3

(3) How many years old are you?

12      13      14      15      16      17      18      19 or older

**2. Use of cigarettes, e-cigarettes, and HnB**

(1) Have you ever smoked a combustible cigarette including even a single puff? A

combustible cigarette made from rolled paper and tobacco and smoked with fire.

No, I have not      Yes, I have

(2) How many days have you smoked combustible cigarettes in the previous 30 days?

0 days    1–2 days    3–5 days    6–9 days    10–19 days    20–29 days    every day

(3) Have you ever used an electronic cigarette including even a single puff? Electronic

cigarettes include フレヴォ (FLEVO), エミリ (EMILI), ビタフル (VITAFUL), ビタシグ (VITASIG).

No, I have not      Yes, I have

(4) How many days have you used electronic cigarettes in the previous 30 days?

0 day    1–2 days    3–5 days    6–9 days    10–19 days    20–29 days    every day

- (5) Have you ever used a Heat-not-Burn tobacco including even a single puff? HnB tobacco was explained by using product names to avoid any confusion; for example, heat-not-burn tobacco includes アイコス (IQOS), プルूमテック (Ploom Tech), グロー (glo).

No, I have not      Yes, I have

- (6) How many days have you used Heat-not-Burn tobacco in the previous 30 days?

0 days    1–2 days    3–5 days    6–9 days    10–19 days    20–29 days    every day

### 3. Environment and behavior of smoking

- (1) In the past 7 days, how frequently did someone smoke near you at home?

0 days    1–2 days    3–4 days    5–6 days    7 days

- (2) In the past 7 days, how frequently did someone smoke close to you outside home?

0 days    1–2 days    3–4 days    5–6 days    7 days

- (3) Do you think smoking is harmful to your body?

I do not think that smoking is harmful

I think that smoking might be a little harmful but not much

I think that smoking is harmful

I am not sure

- (4) Do you think that smoke from other people's cigarettes is harmful to you?

I do not think it is harmful

I think it is probably not harmful

I think it probably is harmful

I think it is harmful

#### 4. Alcohol use

(1) How many days did you drink alcohol in the previous 30 days?

0 days    1–2 days    3–5 days    6–9 days    10–19 days    20–29 days    every day

(2) How often do you drink a lot when you drink alcohol? "A lot" means "5 or more" in an ordinary can (350 ml, if it is a beer and sweet cider)?

I do not drink alcohol    less than once in a year    several times in a year  
once or twice in a month    once or twice in a week  
more than three times in in a week

#### 5. Lifestyle behaviors

(1) Do you have a breakfast every day?

I do almost every day    I do sometimes    I seldom do

(2) Do you participate in club activities?

I participate actively    I participate but not actively    I do not participate

#### 6. School life

(1) What do you plan for your future course? Please select one the answer that is closest to your current feelings.

vocational school    junior college    college    postgraduate school  
taking a job after graduating the current school    not decided yet

**Supplementary file 2.** The risk of exclusive alternative product use compared with exclusive cigarette use among any product users ( $n = 757$ ).

| Variables                                | OR   | 95% CI       | <i>p</i> -Value |
|------------------------------------------|------|--------------|-----------------|
| Sex                                      |      |              |                 |
| Female                                   | 1.01 | 0.71 to 1.43 | 0.97            |
| Male (reference)                         | 1.00 |              |                 |
| School grade *                           | 0.96 | 0.92 to 0.99 | 0.02            |
| Understand that smoking is harmful       |      |              |                 |
| Yes                                      | 1.00 | 0.71 to 1.42 | 0.98            |
| No (reference)                           | 1.00 |              |                 |
| Having breakfast every day               |      |              |                 |
| Everyday                                 | 0.78 | 0.56 to 1.08 | 0.14            |
| Sometimes, seldom (reference)            | 1.00 |              |                 |
| Participating in club activities         |      |              |                 |
| Yes                                      | 1.85 | 1.34 to 2.57 | < 0.01          |
| No (reference)                           | 1.00 |              |                 |
| Intending to pursue higher education     |      |              |                 |
| College or postgraduate school           | 1.13 | 0.79 to 1.60 | 0.51            |
| Others (reference)                       | 1.00 |              |                 |
| Second-hand smoking at home              |      |              |                 |
| At least once in the preceding 7 days    | 1.04 | 0.75 to 1.42 | 0.83            |
| None in the preceding 7 days (reference) | 1.00 |              |                 |
| Currently drinking alcohol               |      |              |                 |
| At least once in the previous month      | 0.36 | 0.26 to 0.49 | <0.01           |
| None in the previous month (reference)   | 1.00 |              |                 |

\* This variable was modelled as a continuous variable. Abbreviations: OR = odds ratio, 95%CI = 95% confidence interval
